# Supplementary material
Source: publisher site journal article supplement (http://www.spandidos-publications.com/3304/downloadSupplementary)
Supplement: Supplementary file 1 [file downloadSupplementary]

## Sheet: Sheet1
Table SI. Top 20 GO terms: Specific information.
GO ID	GOTerm	Classification	Number of select	Number of genes	-log10 P value	P-Value
GO:0005737	cytoplasm	Cellular Component	39	60	5.29717	5.0446e-06
GO:0070433	negative regulation of nucleotide-binding oligomerization domain containing 2 signaling pathway	Biological Process	2	58	4.45761	3.4865e-05
GO:0010606	positive regulation of cytoplasmic mRNA processing body assembly	Biological Process	2	58	3.76153	0.000173169
GO:0004535	poly(A)-specific ribonuclease activity	Molecular Function	2	59	3.11397	0.000769176
GO:0032088	negative regulation of NF-kappaB transcription factor activity	Biological Process	3	58	2.7628	0.00172663
GO:0017075	syntaxin-1 binding	Molecular Function	2	59	2.70733	0.00196188
GO:0010507	negative regulation of autophagy	Biological Process	2	58	2.58938	0.00257405
GO:0000289	nuclear-transcribed mRNA poly(A) tail shortening	Biological Process	2	58	2.47875	0.00332085
GO:0001892	embryonic placenta development	Biological Process	2	58	2.47875	0.00332085
GO:0032473	cytoplasmic side of mitochondrial outer membrane	Cellular Component	1	60	2.47562	0.00334485
GO:0090085	regulation of protein deubiquitination	Biological Process	1	58	2.46312	0.00344255
GO:0002154	thyroid hormone mediated signaling pathway	Biological Process	1	58	2.46312	0.00344255
GO:2001294	malonyl-CoA catabolic process	Biological Process	1	58	2.46312	0.00344255
GO:1903125	negative regulation of thioredoxin peroxidase activity by peptidyl-threonine phosphorylation	Biological Process	1	58	2.46312	0.00344255
GO:0021830	interneuron migration from the subpallium to the cortex	Biological Process	1	58	2.46312	0.00344255
GO:0010933	positive regulation of macrophage tolerance induction	Biological Process	1	58	2.46312	0.00344255
GO:0006426	glycyl-tRNA aminoacylation	Biological Process	1	58	2.46312	0.00344255
GO:0032817	regulation of natural killer cell proliferation	Biological Process	1	58	2.46312	0.00344255
GO:0043244	regulation of protein complex disassembly	Biological Process	1	58	2.46312	0.00344255
GO:0035564	regulation of kidney size	Biological Process	1	58	2.46312	0.00344255
